# Supplementary material for: Optimal parameters for the ocean's nutrient, carbon, and oxygen cycles compensate for circulation biases but replumb the biological pump
Source: Copernicus journal article supplement (doi:10.5194/bg-20-2985-2023), 2023-07-26
Supplement: Supplementary file 1 [file bg-20-2985-2023-supplement.pdf]

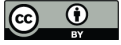

*Supplement of*

## **Optimal parameters for the ocean’s nutrient, carbon, and oxygen cycles compensate for circulation biases but replumb the biological pump**

**Benoît Pasquier et al.**

*Correspondence to:* Benoît Pasquier ([b.pasquier@unsw.edu.au](mailto:b.pasquier@unsw.edu.au))

The copyright of individual parts of the supplement might differ from the article licence.

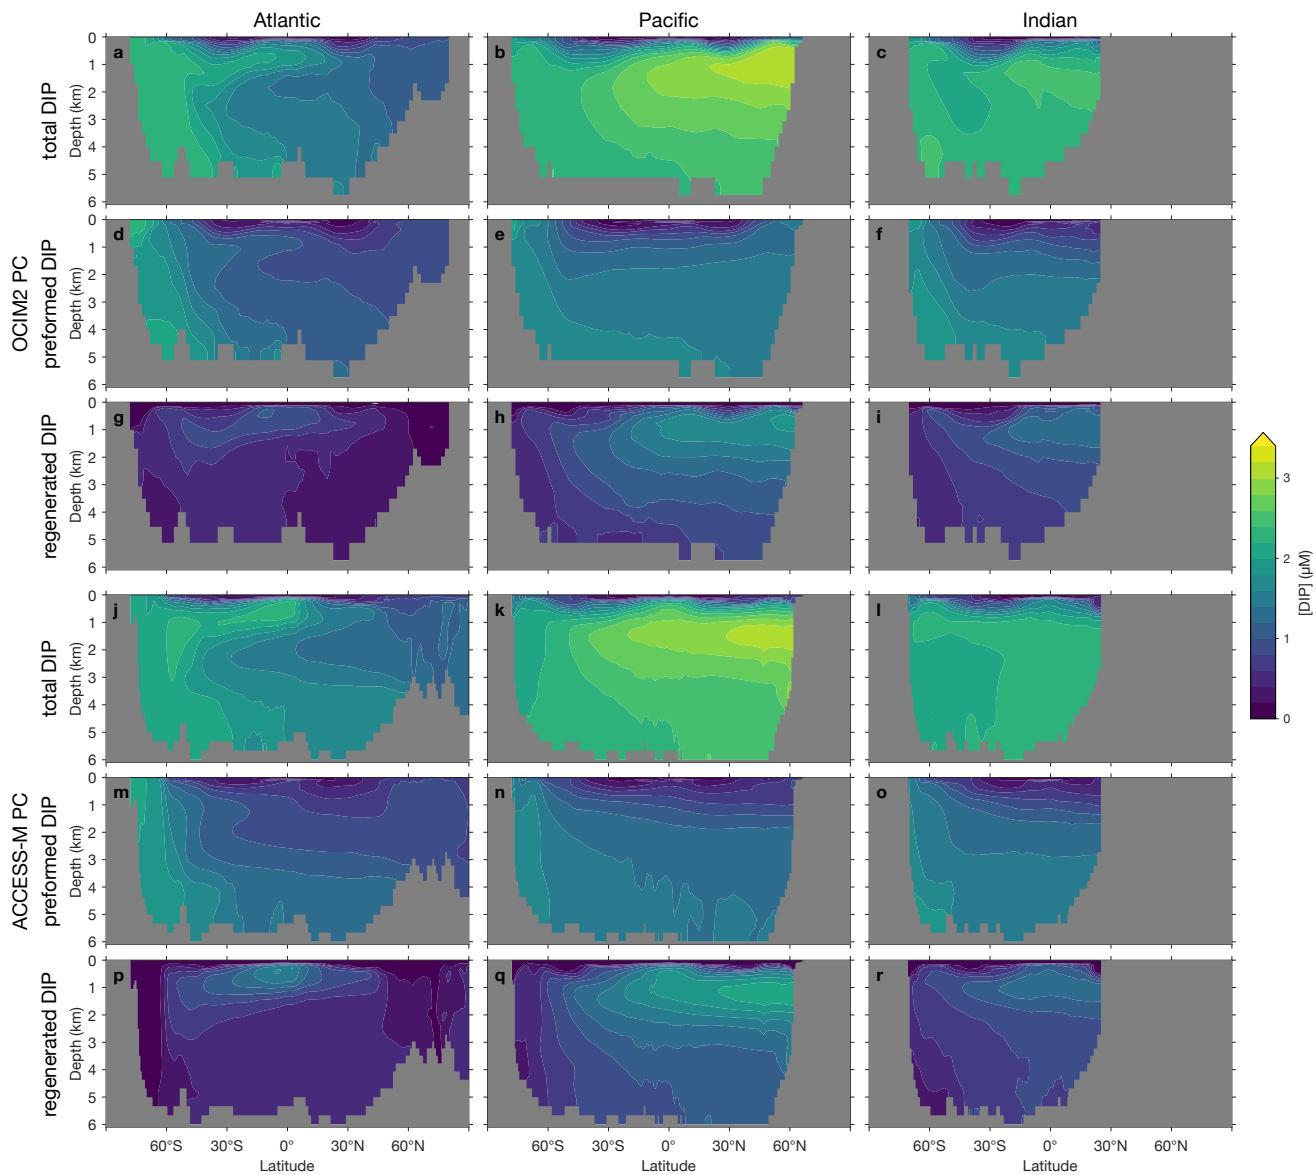

**Figure S1.** (a–c) Basin zonal means of total DIP from the PC model embedded in OCIM2 for the Atlantic (a, left), Pacific (b, center), and Indian Ocean (c, right). (d–f) As (a–c) but for preformed DIP. (g–i) As (a–c) but for regenerated DIP. (j–r) As (a–i) but for ACCESS-M.

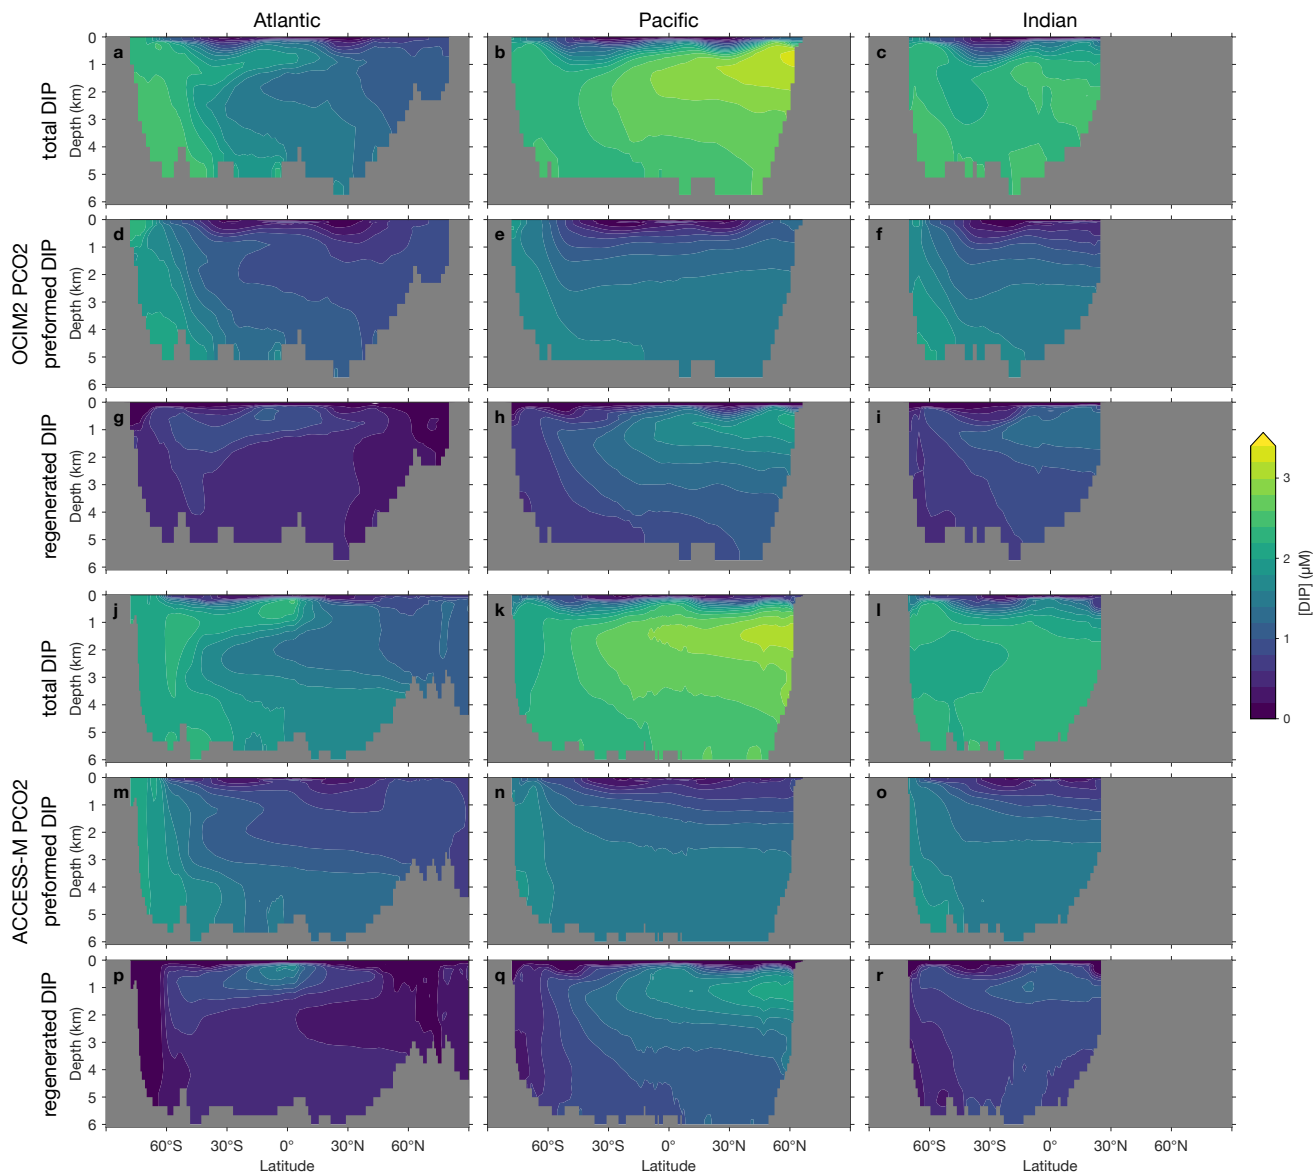

**Figure S2.** (a–c) Basin zonal means of total DIP from the PCO2 model embedded in OCIM2 for the Atlantic (a, left), Pacific (b, center), and Indian Ocean (c, right). (d–f) As (a–c) but for preformed DIP. (g–i) As (a–c) but for regenerated DIP. (j–r) As (a–i) but for ACCESS-M.

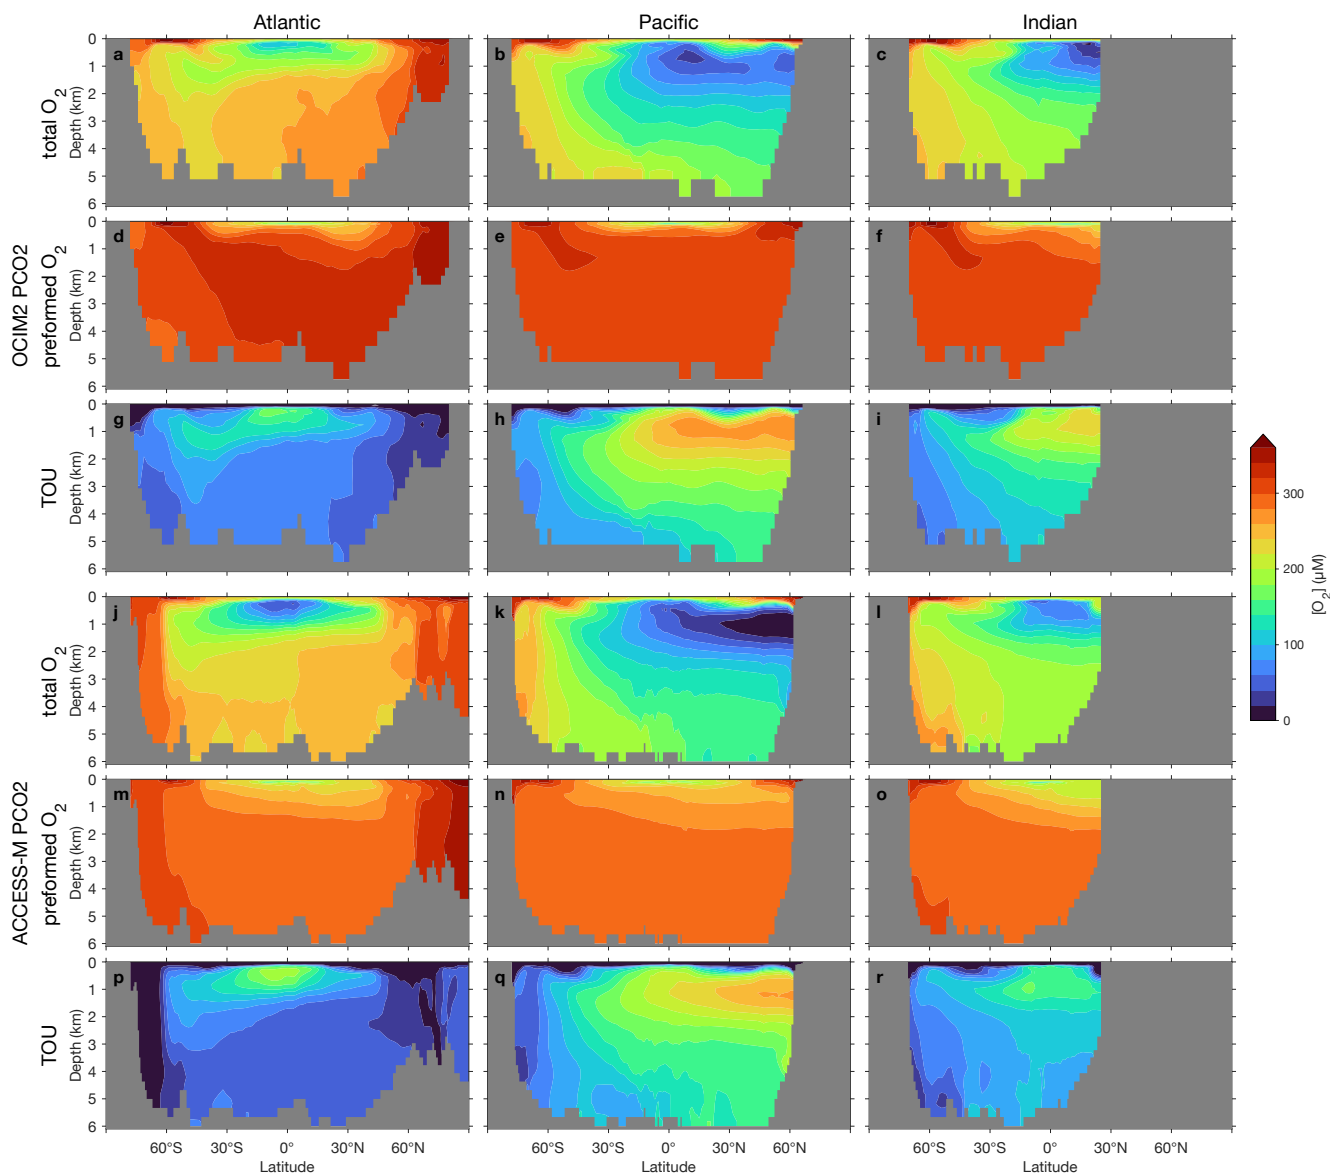

**Figure S3.** (a–c) Basin zonal means of total O<sub>2</sub> from the PCO<sub>2</sub> model embedded in OCIM2 for the Atlantic (a, left), Pacific (b, center), and Indian Ocean (c, right). (d–f) As (a–c) but for preformed O<sub>2</sub>. (g–l) As (a–c) but for true oxygen utilization (TOU = [O<sub>2</sub><sup>pre</sup>] – [O<sub>2</sub>]). TOU can be thought as “negative regenerated” oxygen. TOU = –[O<sub>2</sub><sup>reg</sup>], and is computed directly from Eq. D10–11 by replacing  $R$  with the oxygen utilization rate. (j–r) As (a–l) but for ACCESS-M.

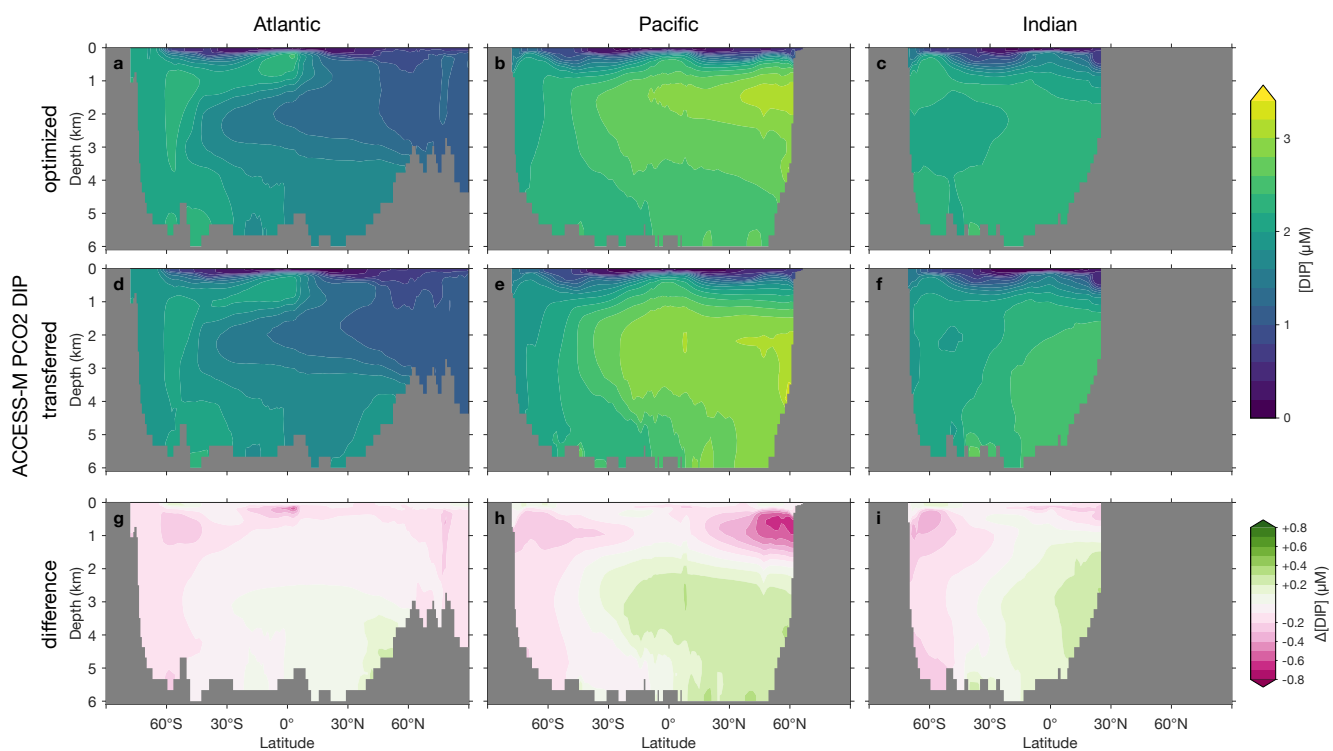

**Figure S4.** (a–c) Basin zonal means of DIP from the PCO<sub>2</sub> model optimized in ACCESS-M for the Atlantic (a, left), Pacific (b, center), and Indian Ocean (c, right). (d–f) As (a–c) but for non-optimized parameters transferred from the OCIM2 optimization. (g–i) Difference in DIP between transferred and optimized parameters.

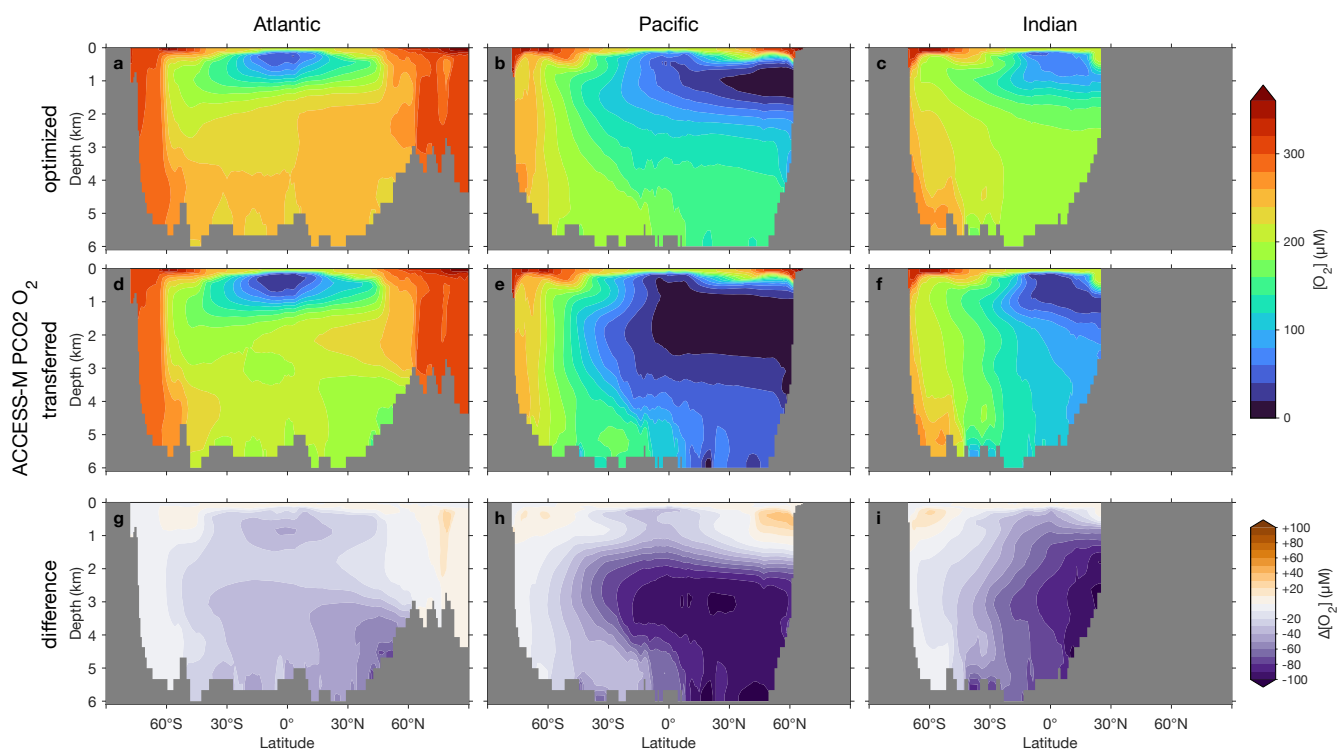

**Figure S5.** (a–c) Basin zonal means of  $O_2$  from the PCO<sub>2</sub> model optimized in ACCESS-M for the Atlantic (a, left), Pacific (b, center), and Indian Ocean (c, right). (d–f) As (a–c) but for non-optimized parameters transferred from the OCIM2 optimization. (g–i) Difference in  $O_2$  between transferred and optimized parameters.

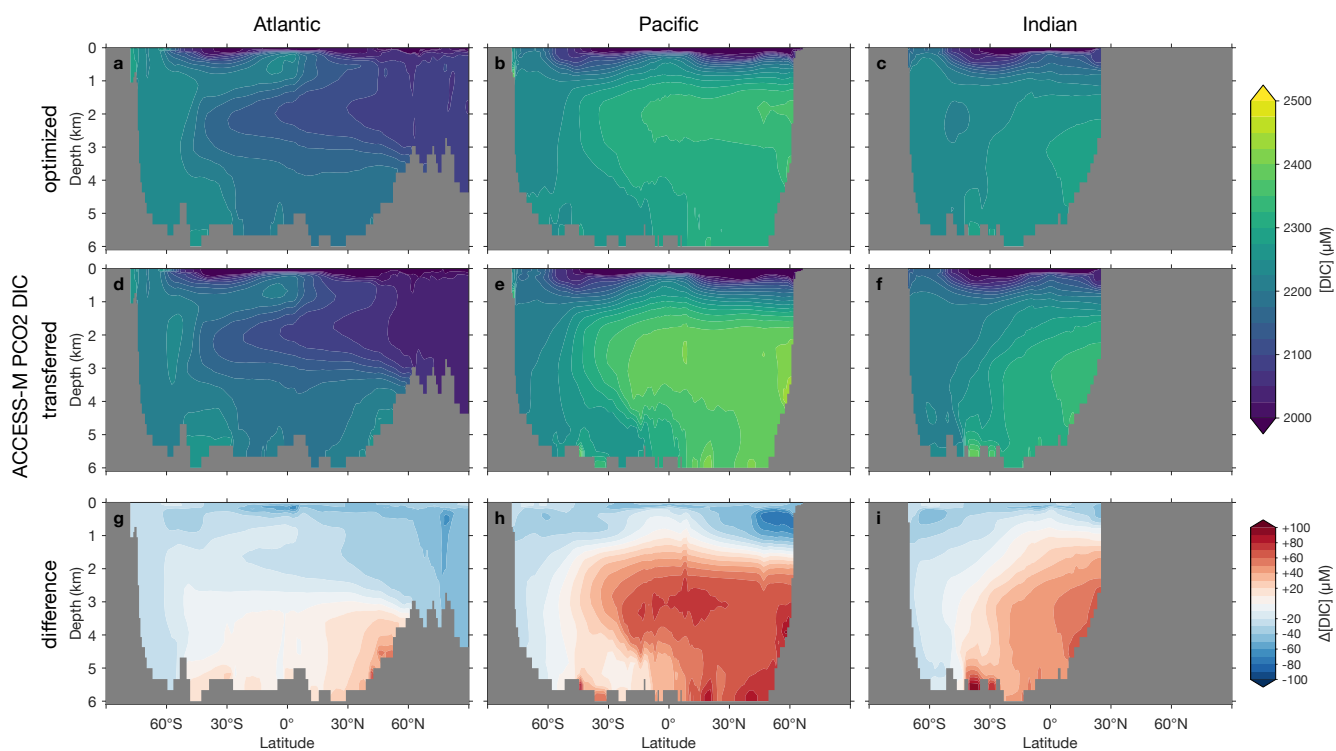

**Figure S6.** (a–c) Basin zonal means of DIC from the PCO<sub>2</sub> model optimized in ACCESS-M for the Atlantic (a, left), Pacific (b, center), and Indian Ocean (c, right). (d–f) As (a–c) but for non-optimized parameters transferred from the OCIM2 optimization. (g–i) Difference in DIC between transferred and optimized parameters.
